# Supplementary material for: Functional analysis of the biochemical activity of mammalian phosphatidylinositol 5 phosphate 4-kinase enzymes
Source: PubMed Central journal article supplement (PMC6379509; doi:10.1042/bsr20182210), 2019-02-19

A.

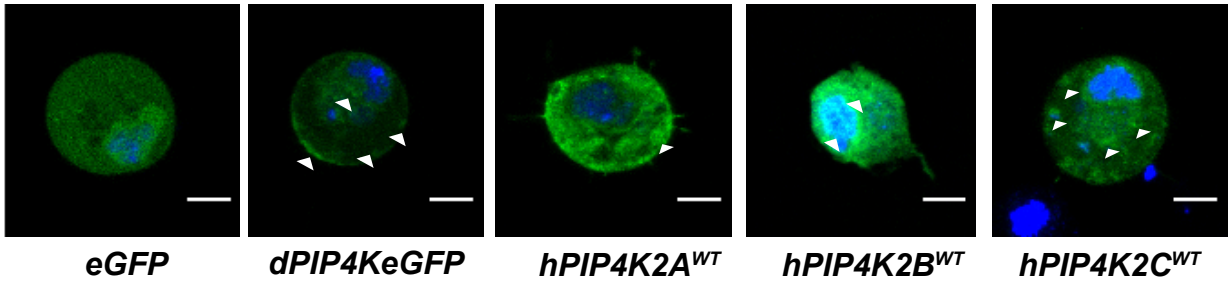

B. i.

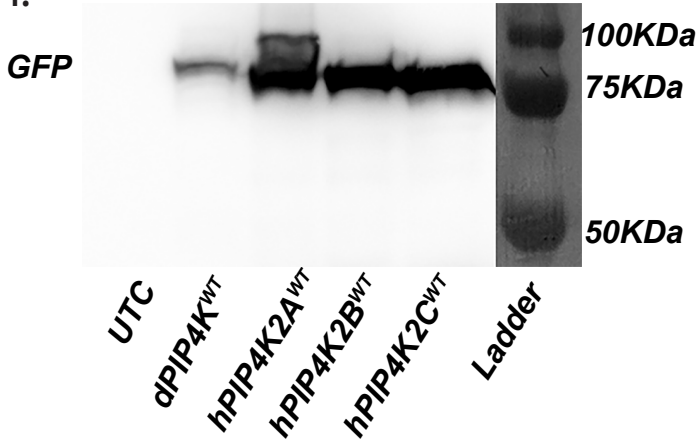

ii.

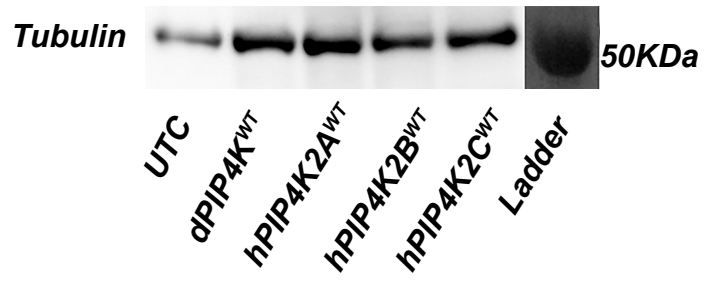

C.

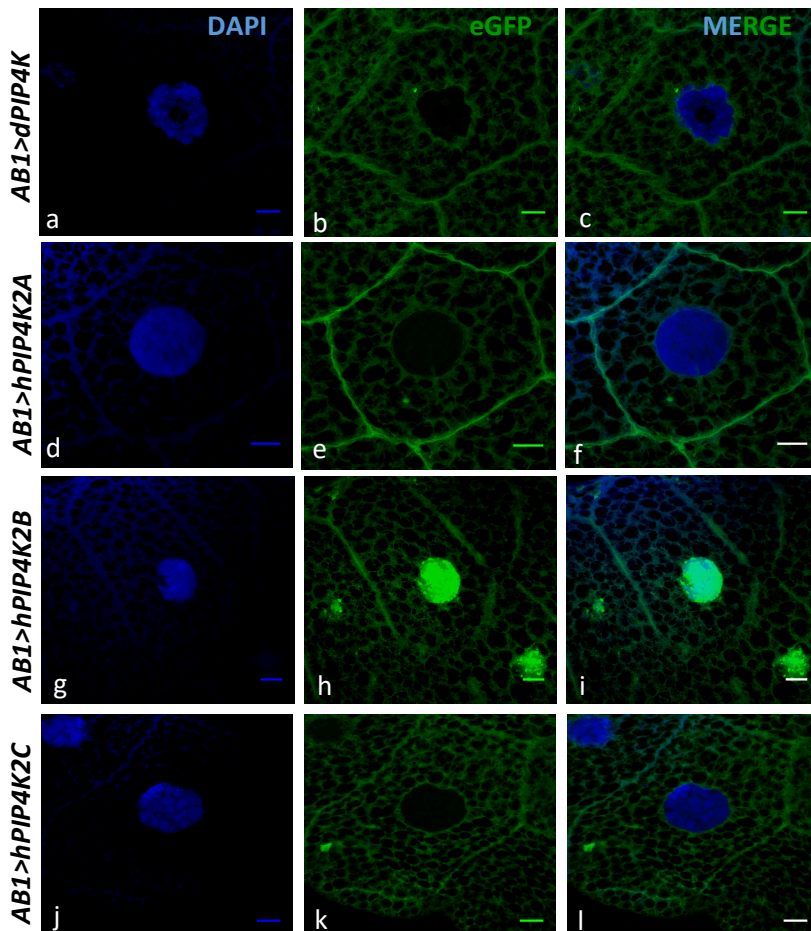

Supplement: bsr-39-bsr20182210_Supp1.pdf [file bsr-39-bsr20182210_Supp1.pdf]
